1 **A primitive starfish ancestor from the Early Ordovician of**  
2 **Morocco reveals the origin of crown group Echinodermata**

3

4 **Short title:** Starfish ancestor illuminates echinoderm evolution

5

6 **Aaron W. Hunter**

7 **Roles:** Equal contribution to research, discussion and manuscript preparation. Photographed  
8 fossil material and prepared the specimen figures.

9 \* Email: [awh31@cam.ac.uk](mailto:awh31@cam.ac.uk) (AWH)

10 **Affiliations:** Department of Earth Sciences, University of Cambridge, Downing Street, Cambridge,  
11 CB2 3EQ, UK and School of Earth Sciences, The University of Western Australia, 35 Stirling  
12 Highway, Crawley, WA 6009, Australia.

13 **ORCID:** <http://orcid.org/0000-0002-3527-5835>

14

15 **Javier Ortega-Hernández**

16 **Roles:** Equal contribution to research, discussion and manuscript preparation. Designed and  
17 ran the phylogenetic analyses, and prepared the corresponding diagrams.

18 \* Email: [jo314@cam.ac.uk](mailto:jo314@cam.ac.uk) (JO-H)

19 **Affiliations:** Department of Zoology, University of Cambridge, Downing Street, Cambridge, CB2  
20 3EJ, UK and Museum of Comparative Zoology and Department of Organismic and  
21 Evolutionary Biology, Harvard University, 26 Oxford Street, Cambridge, MA 02138, USA.

22 **ORCID:** <http://orcid.org/0000-0002-6801-7373>

23 The authors declare no competing interests.

## 24 **Abstract**

25 The somasteroids are Ordovician star-shaped animals widely regarded as ancestors of Asterozoa, the  
26 group of extant echinoderms that includes brittle stars and starfish. The phylogenetic position of  
27 somasteroids makes them critical for understanding the origin and early evolution of crown group  
28 Echinodermata. However, the early evolution of asterozoans, the origin of their distinctive body  
29 organization and their relationships with other Cambrian and Ordovician echinoderms, such as  
30 edrioasteroids, blastozoans, crinoids, and other asterozoans, remain problematic due to the difficulties of  
31 comparing the calcitic endoskeleton of these disparate groups. Here we describe the new somasteroid  
32 *Cantabrigiaster fezouataensis* from the Early Ordovician (Tremadocian) Fezouata Lagerstätte in  
33 Morocco. *Cantabrigiaster* shares with other somasteroids the presence of rod-like virgal ossicles that  
34 articulate with the ambulacrals, but differs from all other known asterozoans in the absence of  
35 adambulacral ossicles defining the arm margins. The unique arm construction evokes parallels with  
36 non-asterozoan echinoderms. Developmentally informed Bayesian and parsimony based phylogenetic  
37 analyses, which reflect the homology of the biserial ambulacral ossicles in Paleozoic echinoderms  
38 according to the Extraxial-Axial Theory, recover *Cantabrigiaster* as basal within stem group Asterozoa.  
39 Our results indicate that *Cantabrigiaster* is the earliest diverging stem group asterozoan, revealing the  
40 ancestral morphology of this major clade and clarifying the affinities of problematic Ordovician taxa.  
41 Somasteroids are resolved as a paraphyletic grade within stem and crown group Asterozoa (starfishes),  
42 whereas stenuroids are paraphyletic within stem group Ophiuroidea (brittle stars). *Cantabrigiaster* also  
43 illuminates the relationship between Ordovician crown group Echinodermata and its Cambrian stem  
44 lineage, which includes sessile forms with incipient radial symmetry such as edrioasteroids and  
45 blastozoans. The contentious Pelmatozoa hypothesis (i.e. monophyly of blastozoans and crinoids) is not  
46 supported; instead, blastozoans represent the most likely sister-taxon of crown group Echinodermata.

## 47 **Author summary**

48 Starfish and brittle stars, collectively known as asterozoans, constitute a diverse and ecologically  
49 successful group of echinoderms that first appear in the fossil record some 480Ma. However, the early  
50 evolution of asterozoans, the origin of their distinctive body organization, and their phylogenetic  
51 relationships with Cambrian echinoderms remain largely unresolved. We describe *Cantabrigiaster*  
52 *fezouataensis* gen. et sp. nov., a primitive asterozoan from the Fezouata Lagerstätte, Morocco, with a  
53 unique endoskeletal arm organization that reveals the ancestral morphology of this major clade.  
54 Bayesian and parsimony based phylogenetic analyses indicate that *Cantabrigiaster* is the earliest  
55 diverging stem group asterozoan, and resolve the phylogenetic position of Ordovician asterozoans such  
56 as somasteroids. Our analyses clarify the origin of crown group echinoderms relative to their  
57 problematic Cambrian stem group representatives.

58

## 59 **Introduction**

60 Asterozoans – whose most familiar members include starfish and brittle stars – are the  
61 dominant group of extant echinoderms based on their diversity, abundance, and biogeographic  
62 distribution [1]. Despite their ecological success and a fossil record spanning more than 480  
63 million years [2-4], the origin and early evolution of asterozoans, and that of crown group  
64 echinoderms more generally, remains uncertain given the difficulty of comparing the  
65 organization of the calcified endoskeleton in diverse groups of Lower Paleozoic ancestors,  
66 such as the edrioasteroids and blastozoans [5-13]. The Extraxial-Axial Theory (EAT), which  
67 supports the homology of the biserial ambulacral ossicles of pentarradial echinoderms based  
68 on embryonic and ontogenetic data [14-16], has been proposed as a  
69 developmentally-informed model that would facilitate making comparisons among groups

70 with disparate morphologies. Although the EAT can potentially clarify the early evolution of  
71 crown group Echinodermata, the broad implications of this hypothesis have never been  
72 examined under a comprehensive phylogenetic framework. Consequently, the main  
73 phylogenetic predictions of the EAT pertaining to the evolutionary relationships of Cambrian  
74 and Ordovician echinoderms, such as the origin of the crown group from edrioasteroid-like  
75 ancestors [14-16, 17], have yet to be critically tested.

76 Here, we describe the new somasteroid *Cantabrigiaster fezouataensis* gen. et sp. nov.  
77 from the Early Ordovician (Tremadocian) Fezouata Shale in Zagora, central Anti-Atlas,  
78 Morocco [4] (Fig S1 and SI text). The exceptionally preserved morphology of *Cantabrigiaster*  
79 reveals a unique organization among somasteroids, and allows us to test the phylogenetic  
80 implications of this taxon for the origin of Asterozoa and crown group Echinodermata.

81

## 82 **Results**

### 83 **Systematic Paleontology**

84 (crown group) Echinodermata Bruguière, 1791

85 (stem group) Asterozoa Zittel, 1895

86 Somasteroidea Spencer, 1951

87 *Cantabrigiaster fezouataensis* gen. et sp. nov.

### 88 **Etymology.**

89 Genus name derived from ‘*Cantabrigia*’, after the cities of Cambridge in the UK and USA,  
90 which were home to the influential asterozoan workers John William Salter (University of  
91 Cambridge), Juliet Shackleton (néé Dean) (University of Cambridge), and Howard  
92 Barraclough ‘Barry’ Fell (Harvard University).

93 Holotype.

94 FSL, VOMN 424 961 (Fig 1).

95 Referred material.

96 YPM IP 535545-535559 (Fig S2 and Fig S3).

97 Diagnosis for genus and species.

98 Somasteroid typified by biserial and offset ambulacrals with thin transverse bar, wide

99 perradial groove, multiple interconnected virgal ossicles, and aboral carinal region with

100 network of spicule-like ossicles. Adambulacrals lacking along abaxial body

101 margins.

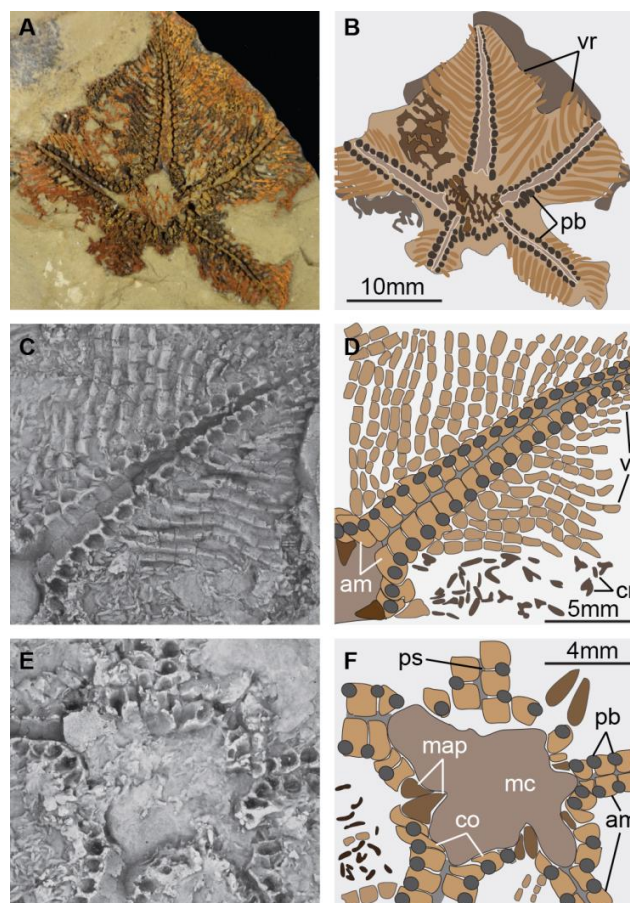

102

103 **Fig 1. *Cantabrigiaster fezouataensis* from the Lower Ordovician (Tremadocian) of**  
104 **Morocco.** Holotype FSL-VOMN-424961. (A) Oral view (body fossil). (B) Interpretative  
105 diagram of A. (C) Close-up of extended arm (latex mould). (D) Interpretative diagram of C.  
106 (E) Close-up of oral region (latex mould). (F) Interpretative diagram of E. Abbreviations: am,  
107 ambulacrals; co, circummorals; cr, carinal region ossicles; map, mouth angle  
108 plates; mc, mouth cavity; pb, podial basins; ps, podial suture; vr, virgal ossicles.

109 **Description.**

110 The arms are broad, petaloid, and arranged in a pentagonal outline (Figs 1A, 1B, S3A, S3C  
111 and S3D). The aboral skeleton (carinal region) is composed of randomly scattered spicule-like  
112 ossicles arranged into an irregular network (Figs 1A, 1B, S2D, S3E and S3G). On the oral  
113 side, the ambulacrals consist of flattened ossicles with a subquadrate outline. These ossicles  
114 abut each other following the orientation of the perradial axis (Figs 1C, 1D, S2A, S2C, S2F  
115 and S2G). The perradial suture is straight, and the ambulacrals at either side are stepped out of  
116 phase by approximately half an ossicle. The abaxial organization of the ambulacrals consists  
117 of an elevated perradial ridge, less than a quarter in width relative to the ambulacral, and bears  
118 a thin transverse bar that occupies a central position conferring a T-shape in oral view (Figs  
119 1C, 1D, S2A, S2E and S2G). The perradial ridges of the ambulacral ossicles at either side of  
120 the perradial suture are substantially separated from each other, forming a wide oral groove  
121 (Figs 1C-E, S2A-C and S2G). The podial basins are shared equally between adjacent  
122 ambulacrals. Abaxially, the following ossicle series consist of the perpendiculars, also known  
123 as virgals in somasteroids [2, 5, 6]. The perpendicular series is composed of interconnected  
124 and robust rod-like virgal ossicles without spines. These ossicles follow a perpendicular  
125 orientation relative to the perradial suture (Figs 1A-D and S2). The virgal ossicles close to the  
126 ambulacrals are the largest, and become smaller in length and width towards the abaxial body  
127 margins. Likewise, adjacent perpendicular series are in direct contact with each other  
128 adaxially relative to the perradial suture, whereas it is possible to observe open gaps between  
129 them towards the abaxial body margins. Proximal (relative to the mouth) perpendiculars series  
130 consist of up to nine virgal ossicles, that gradually decrease in number towards the tips of the  
131 arms (Figs 1A-D and 2). The circumoral ossicles are enlarged relative to ambulacral ossicles,



132 and the first podial pore is shared equally with the small and sub-triangular mouth angle  
133 plates (Figs 1E and 1F). The madreporite is not preserved.

134

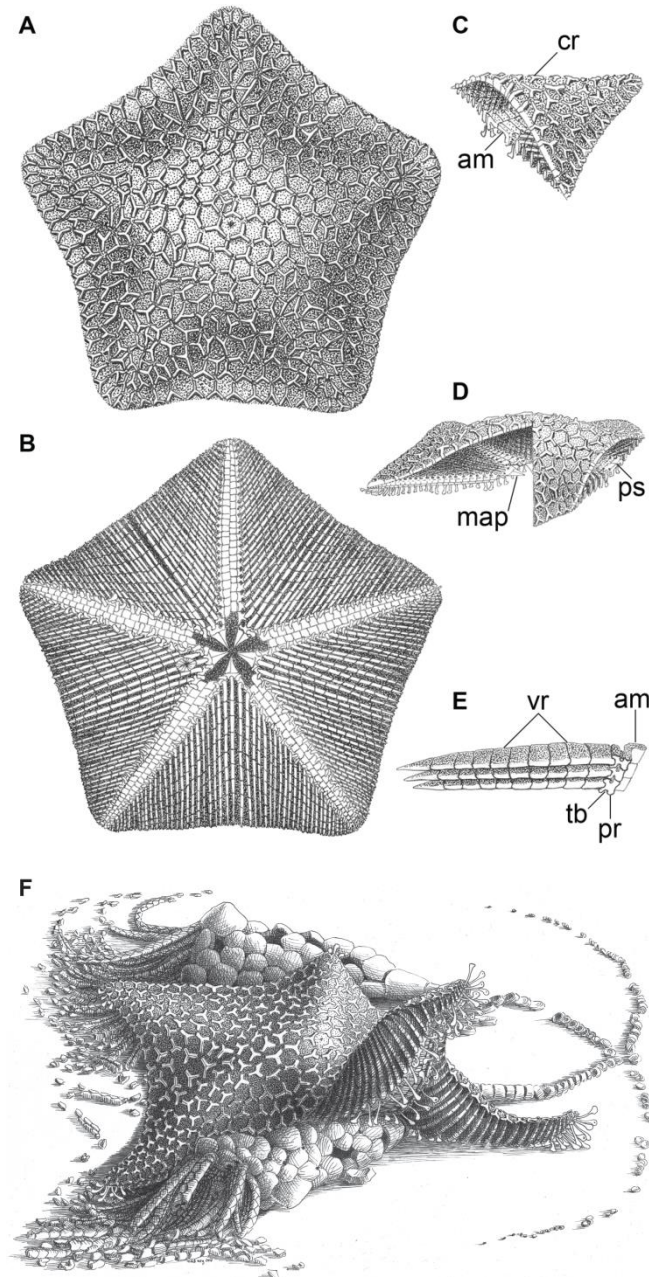

135

136

137 **Fig 2. Morphological reconstruction of *Cantabrigiaster fezouataensis*.** (A) Aboral view. (B)  
138 Oral view. (C) Cross section of isolated arm in oblique view. (D) Cross section of main body  
139 cavity lateral view. (E) Isolated virginal ossicle series and ambulacrals in oral view. (F) Life  
140 reconstruction of *Cantabrigiaster fezouataensis*. Artwork by Marguerite Lardanchet.

141 Abbreviations: am, ambulacral ossicles; cr, carinal region ossicles; map, mouth angle plates;  
142 pr, perradial ridge; ps, podial suture; tb, transverse bar; vr, virginal ossicles.

143

## 144 **Discussion**

145 The presence of virgal ossicles in *Cantabrigiaster* strongly supports its affinities with  
146 somasteroids [2, 5-9, 14, 21]. *Cantabrigiaster* bears the greatest similarity to the Tremadocian  
147 taxa *Chinianaster*, *Thoralaster*, and *Villebrunaster* (Fig S4), but is unique among  
148 somasteroids in lacking ossicles along the abaxial lateral margins of the arms (Figs 1A and  
149 1D). The arm construction of *Cantabrigiaster* consists of flattened and offset biserial  
150 ambulacrals, each of which articulates with an abaxially-oriented (i.e. perpendicular)  
151 perpendicular series composed of simple virgal ossicles (Fig 2). In addition to these features,  
152 the arms of all other somasteroids also possess a series of axially-oriented ossicles along the  
153 lateral margins that vary from small and bead-like – albeit with occasional spikes – in  
154 Tremadocian taxa [2, 5, 6] (Fig S4), to robust and block-like in the stratigraphically younger  
155 (Floian) *Ophioxenikos* [10] and *Arhegonaster* [9]. These comparisons suggest a selective  
156 pressure towards the addition of new ossicle series among early asterozoans (Fig S5).  
157 *Cantabrigiaster* embodies the ancestral condition by virtue of lacking ossicles defining the  
158 lateral arm margins (Figs 1 and 2), whereas other somasteroids record the first appearance of  
159 these structures along the edges of the arms, and their subsequent changes in size and shape.  
160 Based on this sequence, we propose that the origin of new axially-oriented ossicle series in  
161 early asterozoans required their formation on the abaxial edges of the arms. Our hypothesis  
162 implies that the proximity of axially-oriented ossicle series relative to the perradial axis  
163 reflects the order of their evolutionary appearance (Fig S5 and SI text); since virgals are  
164 abaxially-oriented, they are not directly comparable with any of the axially-oriented ossicle  
165 series observed in Paleozoic asterozoans. In this context, *Cantabrigiaster* specifically lacks  
166 the adambulacral ossicle series present in more derived somasteroids, stenuroids, ophiuroids



167 and asteroids, highlighting its profound significance for understanding the evolution of the  
168 asterozoan body plan.

169           The Extraxial-Axial Theory (EAT) supports the homology of the ambulacrals  
170 across pentaradial total-group echinoderms based on their developmental origin and  
171 postembryonic ontogeny [14-17], and allows comparison of the skeletal organization of  
172 *Cantabrigiaster* in a broader phylogenetic scale. Outside Asterozoa, the absence of  
173 adambulacrals in *Cantabrigiaster* draws parallels with Tremadocian crinoids (e.g.  
174 protocrinoids, *Apektocrinus*, *Eknomocrinus*), whose arm construction incorporates flattened  
175 and offset biserial ambulacrals articulated to an abaxially-oriented series of simple ossicles,  
176 here expressed as the cover plates [13, 16-18] (Fig S5 and SI text). A similar axial skeletal  
177 organization is also observed among Cambrian forms, most notably edrioasteroids – which  
178 also possess flattened and offset biserial ambulacrals but lack free appendages [9, 11, 19], and  
179 to a lesser extent blastozoans, which have free appendages formed by modified ambulacrals  
180 known as brachioles [12, 20, 21]. The widespread occurrence of these characters among  
181 non-asterozoan groups suggests that their presence in *Cantabrigiaster* is symplesiomorphic.

182           We designed a comprehensive phylogenetic analysis of Lower Paleozoic  
183 total-group echinoderms in order to test the significance of *Cantabrigiaster* for the origin of  
184 Asterozoa. The dataset reflects the ambulacral homology proposed by the EAT [14-18], the  
185 oral symmetry model proposed by Universal Element Homology [22-24], and our hypothesis  
186 for the correspondence of axially-oriented ossicle series in early asterozoans (Fig S5 and SI  
187 text). Bayesian and parsimony-based analyses recover practically identical topologies (Figs 3,  
188 S6 and S7), despite a modest loss in tree resolution that can be expected from the former  
189 methodology, indicating a robust phylogenetic signal [25]. *Cantabrigiaster* occupies a basal

190 position within total-group Asterozoa, supporting our hypothesis that the absence of  
 191 adambulacrals is ancestral. Tremadocian somasteroids are resolved as a paraphyletic grade  
 192 of stem group asterozoans (per refs [2, 26]; *contra* ref. [5]), whereas the Floian *Ophioxenikos*  
 193 [10] and *Archegonaster* [9] consistently occupy a more derived position as members of crown  
 194 group Asterozoa. The analyses argue against the monophyly of stenuroids [6], but corroborate  
 195 their close phylogenetic relationship to ophiuroids, specifically as their earliest diverging stem  
 196 group representatives [2, 5, 7, 26]. These findings indicate that the evolution of a  
 197 well-developed adambulacral ossicle series constitutes a critical step in the origin of crown  
 198 group Asterozoa, and demonstrate that the abaxially-oriented virgals of somasteroids became  
 199 independently reduced – and ultimately lost – within the stem lineages of Ophiuroidea and  
 200 Asteroidea [6] (Fig S5).

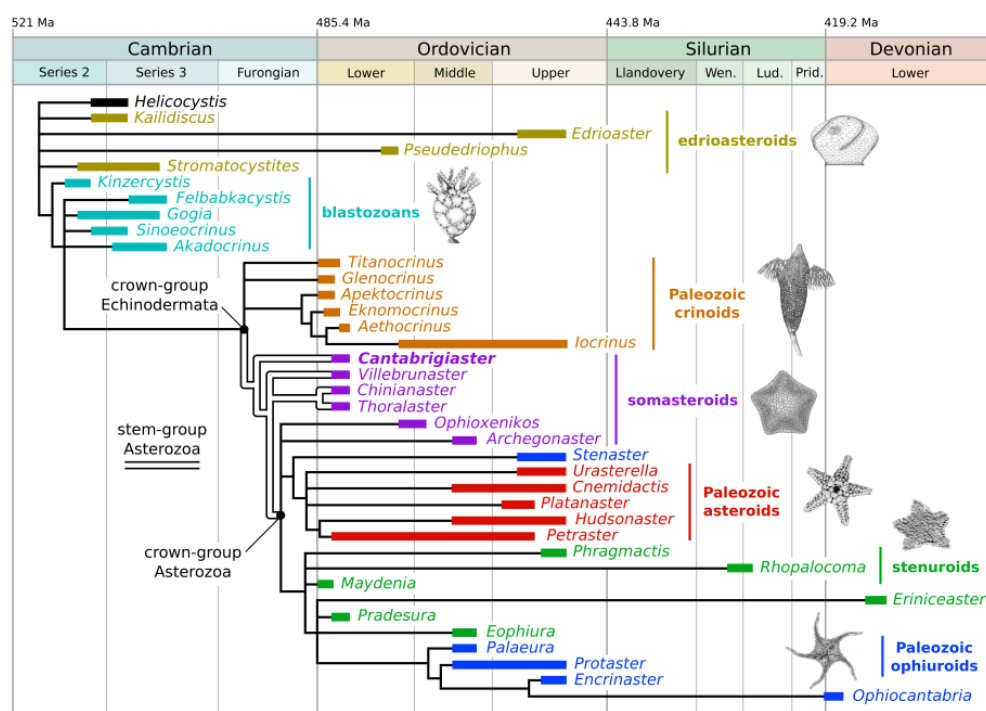

201  
 202 **Fig 3. Evolution of crown group Echinodermata.** Consensus topology based on the  
 203 Bayesian-inference analysis of 38 taxa and 73 morphological characters informed by the EAT  
 204 [14, 15] (SI text). See Fig S6 for support values and comparison with the results of the  
 205 parsimony-based phylogenetic analyses. Stratigraphic ranges of taxa based on refs [3, 6, 12,  
 206 18, 27].

207 Our results also clarify the heated debate over the phylogenetic placement of  
208 Cambrian edrioasteroids and blastozoans relative to Ordovician crinoids and asterozoans [9,  
209 11, 13-18, 20, 22-24, 27] (Figs 3, S6 and S7). Edrioasteroids and blastozoans are resolved as  
210 stem group echinoderms. Contrary to previous hypotheses [8, 9, 11] and predictions from EAT  
211 proponents [13, 16-18], blastozoans – rather than edrioasteroids – are the most derived stem  
212 group representatives, making them strong candidates for the sister-taxon of crown group  
213 Echinodermata. This position confirms that blastozoans are ancestral relative to crinoids, and  
214 simultaneously falsifies the monophyly of these taxa according to the Pelmatozoa hypothesis  
215 [11, 20, 22-24, 27]. Character mapping indicates that most of the features that Tremadocian  
216 crinoids share with edrioasteroids (e.g. flattened and offset biserial ambulacrals, cover plates  
217 [15-18]) and blastozoans (e.g. irregular thecal plating, extended perforate region, 2-1-2  
218 symmetry [22, 23]) are symplesiomorphic (Fig S5). The consensus topology suggests a single  
219 origin for the free appendages of blastozoans and crown group echinoderms, albeit with  
220 fundamental differences in their endoskeletal construction [14,16,17]. Brachioles are  
221 exclusive – and most likely autapomorphic – to blastozoans [12, 20, 21]. The presence of a  
222 straight perradial suture, and the aboral extension of the body wall over the arms forming  
223 coelomic cavities, represent fundamental synapomorphies uniting total-group Crinoidea and  
224 total-group Asterozoa [15-17], despite rare examples of convergence within the echinoderm  
225 stem group [22, 27]. Ultimately, our findings reconcile the evidence supporting the homology  
226 of ambulacral and oral ossicle organization in edrioasteroids, blastozoans, crinoids and  
227 asterozoans, into a robust phylogenetic hypothesis that informs the origin of crown group  
228 Echinodermata and the gradual early evolution of the archetypical asterozoan body plan (Figs  
229 3 and S5).

## 230 **Materials and Methods**

### 231 **Specimen analysis**

232 Studied material is deposited at the Faculty of Science, Claude Bernard University of Lyon 1  
233 (FSL-VOMN), Natural History Museum of Nantes (MHNN), National Museum, Prague  
234 (NM-P), and Yale Peabody Museum, Yale University (YPM). Latex molds were made of all  
235 the material with the exception of that of the YPM. The material was photographed with a  
236 Nikon D5500 SLR fitted with Micro Nikkor 40mm.

237

### 238 **Phylogenetic analysis**

239 The character matrix for the phylogenetic analyses includes 38 taxa and 73 characters (see  
240 Dataset S1 and S2); detailed discussion of character scoring and applicability are provided  
241 below. The Bayesian analysis was run in MrBayes 3.2 using the Monte Carlo Markov-chain  
242 model for discrete morphological characters [28, 29] for 10 million generations (four chains),  
243 with every 1000<sup>th</sup> sample stored (resulting in 10,000 samples), and 25% burn-in (resulting in  
244 7,500 retained samples). The parsimony analyses were run in TNT [30] under New  
245 Technology Search, using Driven Search with Sectorial Search, Ratchet, Drift, and Tree  
246 fusing options activated with standard settings [31, 32]. The analysis was set to find the  
247 minimum tree length 100 times and to collapse trees after each search. All characters were  
248 treated as unordered. For comparative purposes, analyses were performed under equal and  
249 implied weights ( $k=3$ ) to test the effect of homoplasy penalization on the position of  
250 *Cantabrigiaster* and the robustness of the dataset [33]. Comparisons between results of the  
251 phylogenetic analyses are presented in figures S6 and S7. Parsimony-based analysis under  
252 Traditional Search with 10,000 replicates produced identical results as those obtained under  
253 New Technology Search.

## 254 **Acknowledgements**

255 We acknowledge support from a Herchel Smith Research Fellowship in Biological Sciences, a  
256 Bye-Fellowship at Emmanuel College (both JO-H) and visiting fellowship at Clare Hall  
257 (AWH). National Geographic for funded the collection of the holotype. Dr. Emmanuel Robert  
258 (FSL) is thanked for assisting access to the holotype and other figured material. Additional  
259 thanks go to Dr. Martin Valent (NM-P) for access to types of *Archegonaster*. Dr. Fred  
260 Hotchkiss (MPRI) and the Yale Peabody Museum assisted in securing the lectotypes.

261

## 262 **References**

- 263 1. Brusca RC, Moore W, Shuster SM. Invertebrates. 3rd ed. Sunderland Massachusetts:  
264 Sinauer Associates, Inc.; 2016.
- 265 2. Blake DB, Guensburg TE. The class Somasteroidea (Echinodermata, Asterozoa):  
266 morphology and occurrence. *J Paleontol.* 2015;89: 465–86.
- 267 3. Jell PA. A Tremadocian asterozoan from Tasmania and a late Llandovery edrioasteroid  
268 from Victoria. *Alcheringa.* 2014;38: 528–40.
- 269 4. Lefebvre B, Allaire N, Guensburg TE, Hunter AW, Kouraïss K, Martin ELO, et al.  
270 Palaeoecological aspects of the diversification of echinoderms in the Lower Ordovician  
271 of central Anti-Atlas, Morocco. *Palaeogeograph Palaeoclimatol Palaeoecol.* 2016;460:  
272 97–121.
- 273 5. Blake DB. Early asterozoan (Echinodermata) diversification: a paleontologic quandary. *J*  
274 *Paleontol.* 2013;87: 353–72.

- 275 6. Shackleton JD. Skeletal homologies, phylogeny and classification of the earliest  
276 asterozoan echinoderms. *J Syst Palaeontol.* 2005;3: 29–114.
- 277 7. Dean J. What makes an ophiuroid? A morphological study of the problematic Ordovician  
278 stelleroid *Stenaster* and the palaeobiology of the earliest asteroids and ophiuroids. *Zoolog*  
279 *J Linn Soc.* 1999;126: 225–50.
- 280 8. Mah CL, Blake DB. Global diversity and phylogeny of the Asteroidea (Echinodermata).  
281 *PLoS ONE.* 2012;7: e35644.
- 282 9. Smith AB, Jell PA. Cambrian edrioasteroids from Australia and the origin of starfishes.  
283 *Memoirs of the Queensland Museum.* 1990;28: 715–78.
- 284 10. Blake DB, Guensburg TE. New Lower and Middle Ordovician stelleroids  
285 (Echinodermata) and their bearing on the origins and early history of the stelleroid  
286 echinoderms. *J Paleontol.* 1993;67: 103–13.
- 287 11. Paul CRC, Smith AB. The early radiation and phylogeny of echinoderms. *Biol Rev.*  
288 1984;59: 443–81.
- 289 12. Nardin E, Lefebvre B, Fatka O, Nohejlová M, Kašička L, Šinágl M, et al. Evolutionary  
290 implications of a new transitional blastozoan echinoderm from the middle Cambrian of  
291 the Czech Republic. *J Paleontol.* 2017;91: 672–84.
- 292 13. Guensburg TE, Sprinkle J. Earliest crinoids: new evidence for the origin of the dominant  
293 Paleozoic echinoderms. *Geology.* 2001;29: 131–4.
- 294 14. Mooi R, David B. What a new model of skeletal homologies tells us about asteroid  
295 evolution. *Amer Zoolog.* 2000;40: 326–39.
- 296 15. Mooi R, David B, Wray GA. Arrays in rays: terminal addition in echinoderms and its  
297 correlation with gene expression. *Evol Dev.* 2005;7: 542–55.



- 298 16. Guensburg TE, Blake DB, Sprinkle J, Mooi R. Crinoid ancestry without blastozoans. *Ac*  
299 *Palaeontol Pol.* 2015;61: 253–66.
- 300 17. Guensburg TE, Sprinkle J. Solving the mystery of crinoid ancestry: new fossil evidence  
301 of arm origin and development. *J Paleontol.* 2009;83: 350–64.
- 302 18. Guensburg TE. Phylogenetic implications of the oldest crinoids. *J Paleontol.* 2012;86:  
303 455–61.
- 304 19. Zhao Y, Sumrall CD, Parsley RL, Peng J. *Kailidiscus*, a new plesiomorphic edrioasteroid  
305 from the basal middle Cambrian Kaili Biota of Guizhou Province, China. *J Paleontol.*  
306 2010;84: 668–80.
- 307 20. Clausen S, Jell PA, Legrain X, Smith AB. Pelmatozoan arms from the Middle Cambrian  
308 of Australia: bridging the gap between brachioles and brachials? *Lethaia.* 2009;42: 283–  
309 96.
- 310 21. Parsley RL, Zhao Y. Long stalked eocrinoids in the basal Middle Cambrian Kaili Biota,  
311 Taijiang County, Guizhou Province, China. *J Paleontol.* 2006;80: 1058–71.
- 312 22. Kammer TW, Sumrall CD, Zamora S, Ausich WI, Deline B. Oral region homologies in  
313 Paleozoic crinoids and other plesiomorphic pentaradial echinoderms. *PLoS ONE.* 2013;8:  
314 e77989.
- 315 23. Wright DF, Ausich WI, Cole SR, Peter ME, Rhenberg EC. Phylogenetic taxonomy and  
316 classification of the Crinoidea (Echinodermata). *J Paleontol.* 2017;91: 829–46.
- 317 24. Ausich WI, Kammer TW, Rhenberg EC, Wright DF. Early phylogeny of crinoids within  
318 the pelmatozoan clade. *Palaeontology.* 2015;58: 937–52.

- 319 25. Puttick MN, O'Reilly JE, Tanner AR, Fleming JF, Clark J, Holloway L, et al.  
320 Uncertain-tree: discriminating among competing approaches to the phylogenetic analysis  
321 of phenotype data. *Proc R Soc Lond B: Biol Sci.* 2017;284: 20162290.
- 322 26. Blake DB, Zamora S, García-Alcalde JL. A new Devonian asteroid-like ophiuroid from  
323 Spain. *Geol Acta.* 2015;13: 335–43.
- 324 27. Zamora S, Smith AB. Cambrian stalked echinoderms show unexpected plasticity of arm  
325 construction. *Proc R Soc Lond B: Biol Sci.* 2011: rspb20110777.
- 326 28. Ronquist F, Teslenko M, Van Der Mark P, Ayres DL, Darling A, Höhna S, et al.  
327 MrBayes 3.2: efficient Bayesian phylogenetic inference and model choice across a large  
328 model space. *Syst Biol.* 2012;61: 539–42.
- 329 29. Lewis PO. Phylogenetic systematics turns over a new leaf. *Tr Ecol Evol.* 2001;16: 30-7.
- 330 30. Goloboff PA, Farris JS, Nixon KC. TNT, a free program for phylogenetic analysis.  
331 *Cladistics.* 2008;24: 774–86.
- 332 31. Goloboff PA. Analyzing large data sets in reasonable times: solutions for composite  
333 optima. *Cladistics.* 1999;15: 415–28.
- 334 32. Nixon KC. The parsimony ratchet, a new method for rapid parsimony analysis.  
335 *Cladistics.* 1999;15: 407–14.
- 336 33. Smith MR, Ortega-Hernández J. Hallucigenia's onychophoran-like claws and the case for  
337 Tactopoda. *Nature.* 2014;514: 363–6.
- 338 34. Destombes J. Stratigraphie et paléogéographie de l'Ordovicien de l'Anti-Atlas (Maroc):  
339 un essai de synthèse. Résumé. *Bull Soc Géolog Fran.* 1962;S7-IV: 453–60.
- 340 35. Destombes J. L'Ordovicien au Maroc. Essai de synthèse stratigraphique. *Mémoire Bur*  
341 *Rech Géolog Min.* 1971;73: 237–63.

- 342 36. Destombes J, Hollard H, Willefert S. Lower Palaeozoic rocks of Morocco. In: Holland  
343 CH, editor. Lower Palaeozoic Rocks of the World. New York: Wiley; 1985. pp. 91–336.
- 344 37. Vidal M. Le modèle des biofaciès à trilobites: un test dans l'Ordovicien inférieur de  
345 l'Anti-Atlas, Maroc. *Comptes Rendus de l'Académie des Sciences-Series IIA-Earth and*  
346 *Planetary Science*. 1998;327: 327–33.
- 347 38. Van Roy P, Orr PJ, Botting JP, Muir LA, Vinther J, Lefebvre B, et al. Ordovician faunas  
348 of Burgess Shale type. *Nature*. 2010;465: 215–8.
- 349 39. Martin ELO, Lefebvre B, Vaucher R. Taphonomy of a stylophoran-dominated  
350 assemblage in the Lower Ordovician of Zagora area (central Anti-Atlas, Morocco). In:  
351 Zamora S, Rabano I, editors. *Progress in Echinoderm Palaeobiology: Cuadernos del*  
352 *Museo Geominero 19*. Madrid: Instituto Geológico y Minero de España; 2015. pp. 95–  
353 100.
- 354 40. Martin ELO, Pittet B, Gutiérrez-Marco J-C, Vannier J, El Hariri K, Lerosey-Aubril R, et  
355 al. The Lower Ordovician Fezouata Konservat-Lagerstätte from Morocco: age,  
356 environment and evolutionary perspectives. *Gondwana Res*. 2016;34: 274–83.
- 357 41. Vaucher R, Martin ELO, Hormière H, Pittet B. A genetic link between Konzentrat-and  
358 Konservat-Lagerstätten in the Fezouata Shale (lower Ordovician, Morocco).  
359 *Palaeogeograph Palaeoclimatol Palaeoecol*. 2016;460: 24–34.
- 360 42. Gutiérrez-Marco JC, Martin ELO. Biostratigraphy and palaeoecology of Lower  
361 Ordovician graptolites from the Fezouata Shale (Moroccan Anti-Atlas). *Palaeogeograph*  
362 *Palaeoclimatol Palaeoecol*. 2016;460: 35–49.
- 363 43. Lefebvre B. Early Palaeozoic palaeobiogeography and palaeoecology of stylophoran  
364 echinoderms. *Palaeogeograph Palaeoclimatol Palaeoecol*. 2007;245: 156–99.

- 365 44. Guensburg TE, Sprinkle J. The oldest known crinoids (Early Ordovician, Utah) and a  
366 new crinoid plate homology system. *Bull Amer Paleontol.* 2003;364: 1–43.
- 367 45. Smith AB. Cambrian eleutherozoan echinoderms and the early diversification of  
368 edrioasteroids. *Palaeontology.* 1985;28: 715–56.
- 369 46. Sumrall CD, Deline B. A new species of the dual-mouthed paracrinoid *Bistomiacystis*  
370 and a redescription of the Edrioasteroid *Edrioaster priscus* from the upper Ordovician  
371 Curdsville member of the Lexington limestone. *J Paleontol.* 2009;83: 135–9.
- 372 47. Zamora S, Gozalo R, Linñán E. Middle Cambrian gogiid echinoderms from Northeast  
373 Spain: Taxonomy, palaeoecology, and palaeogeographic implications. *Ac Palaeontol Pol.*  
374 2009;54: 253–65.
- 375 48. Guensburg TE, Mooi R, Sprinkle J, David B, Lefebvre B. Pelmatozoan arms from the  
376 mid-Cambrian of Australia: bridging the gap between brachioles and brachials?  
377 Comment: there is no bridge. *Lethaia.* 2010;43: 432–40.
- 378 49. Smith AB, Zamora S. Cambrian spiral-plated echinoderms from Gondwana reveal the  
379 earliest pentaradial body plan. *Proc R Soc Lond B: Biol Sci.* 2013;280: 20131197.
- 380 50. Nohejlová M, Fatka O. Ontogeny and morphology of Cambrian eocrinoid *Akadocrinus*  
381 (Barrandian area, Czech Republic). *Bull Geosci.* 2016;91: 141–53.
- 382 51. Sprinkle J, Sumrall CD. New edrioasterine and astrocystitid (Echinodermata:  
383 Edrioasteroidea) from the Ninemile Shale (Lower Ordovician), central Nevada. *J*  
384 *Paleontol.* 2015;89: 346–52.
- 385 52. Ubaghs G. *Aethocrinus moorei* Ubaghs, n. gen., n. sp., le plus ancien crinoïde dicyclique  
386 connu. *University of Kansas Palaeontological Contributions.* 1969;38: 1–25.

- 387 53. Zamora S, Rahman IA, Smith AB. Plated Cambrian bilaterians reveal the earliest stages  
388 of echinoderm evolution. PLoS ONE. 2012;7: e38296.
- 389 54. Sumrall CD. New insights concerning homology of the oral region and ambulacral  
390 system plating of pentaradial echinoderms. J Paleontol. 2017;91: 604–17.
- 391 55. Sumrall CD, Waters JA. Universal elemental homology in glyptocystitoids,  
392 hemicosmitoids, coronoids and blastoids: steps toward echinoderm phylogenetic  
393 reconstruction in derived blastozoa. J Paleontol. 2012;86: 956–72.
- 394 56. Zamora S, Rahman IA, Ausich WI. Palaeogeographic implications of a new iocrinid  
395 crinoid (Disparida) from the Ordovician (Darriwillian) of Morocco. PeerJ. 2015;3: e1450.
- 396
